# Supplementary material for: Supplementation with the Leucine Metabolite β-hydroxy-β-methylbutyrate (HMB) does not Improve Resistance Exercise-Induced Changes in Body Composition or Strength in Young Subjects: A Systematic Review and Meta-Analysis
Source: PubMed Central journal article supplement (PMC7285233; doi:10.3390/nu12051523), 2020-05-23
Supplement: nutrients-12-01523-s001.pdf [file nutrients-12-01523-s001.pdf]

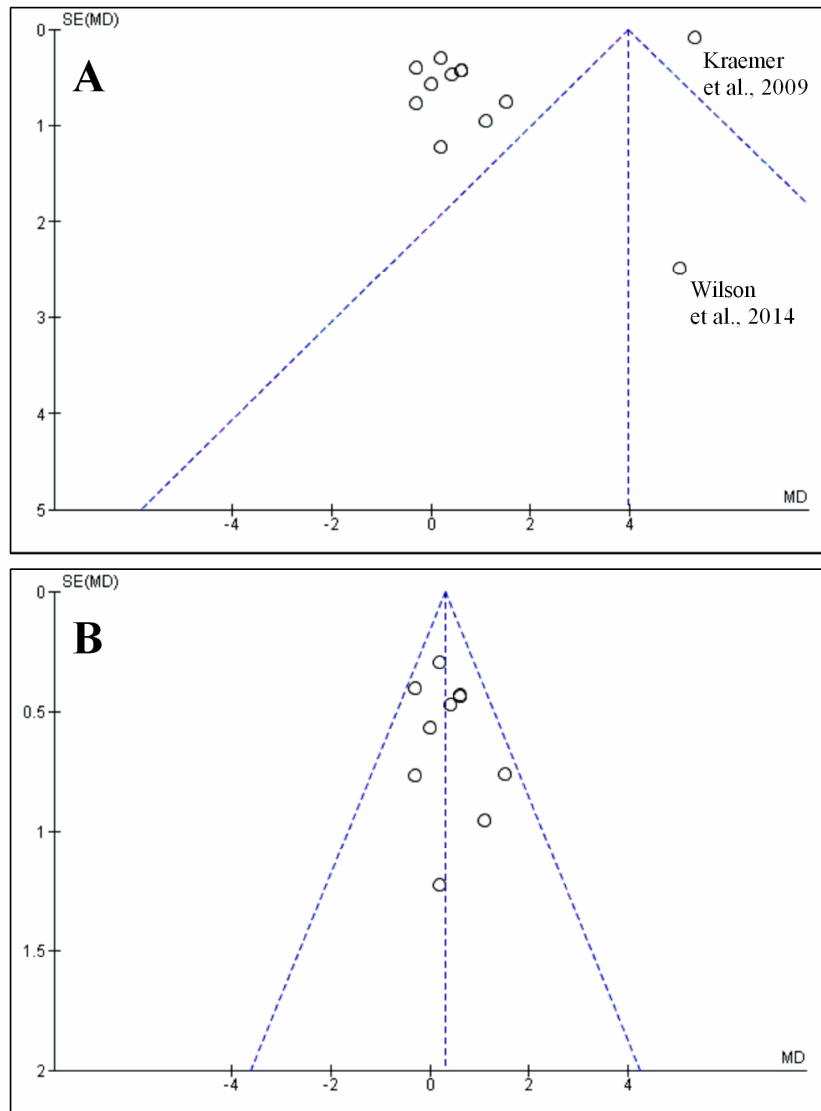

Figure S1: Funnel plots showing relation between mean differences (MD) in x axis and standard errors (SE) for mean differences.

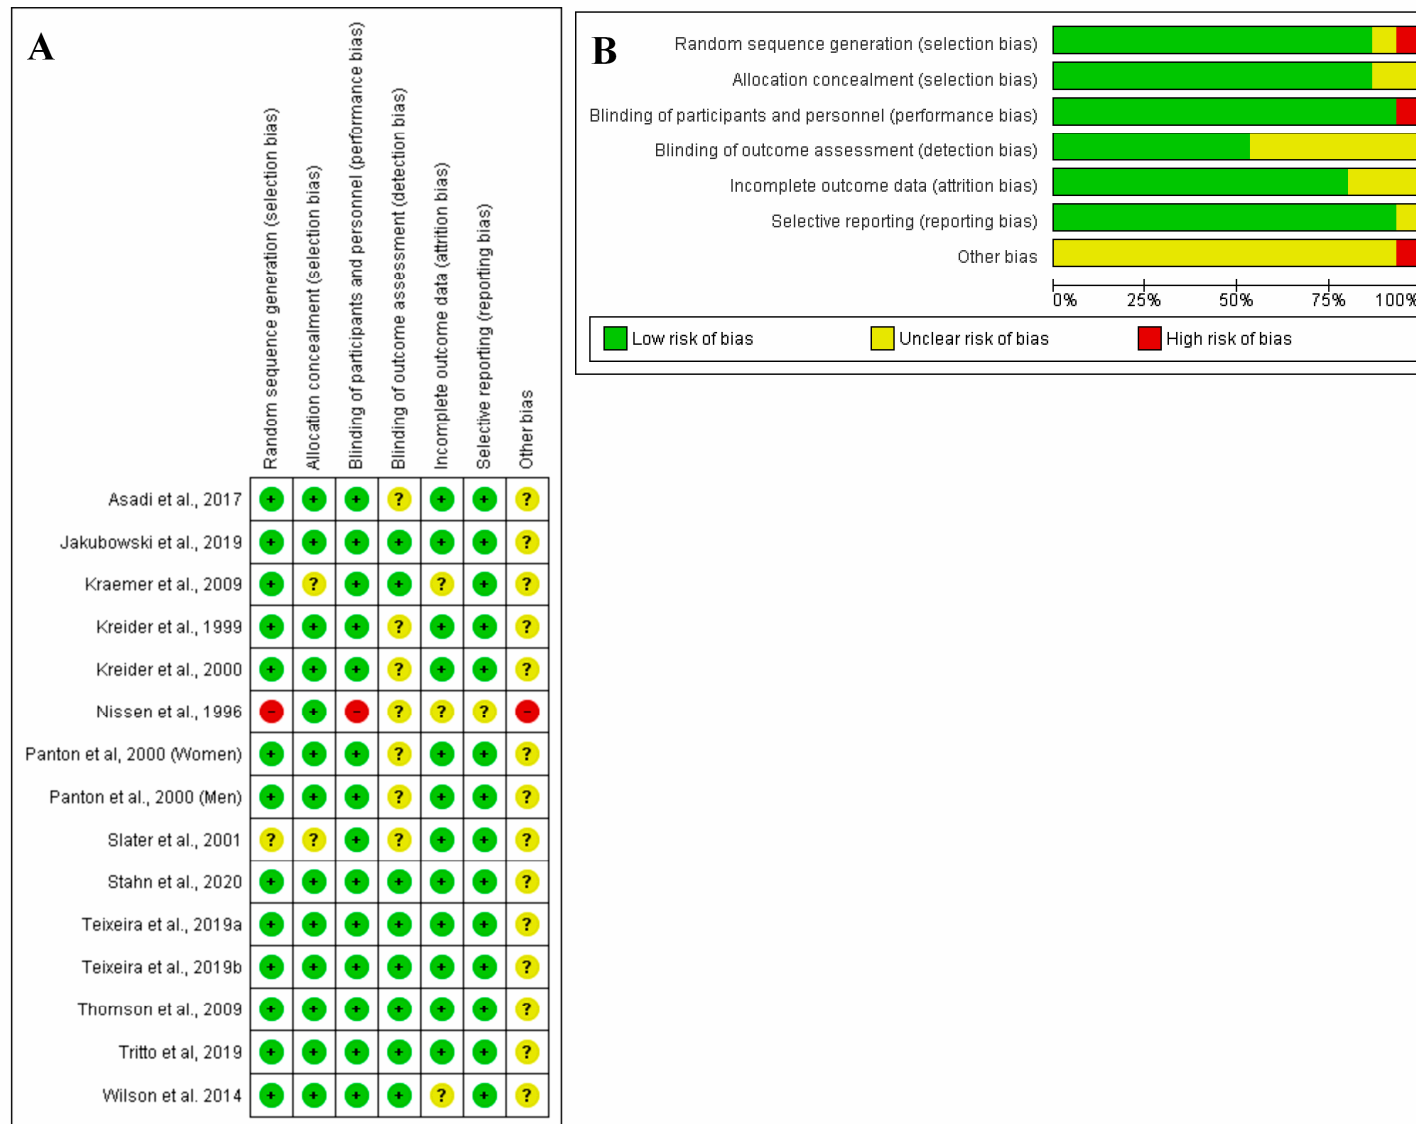

Figure S2: Risk of bias summary for selected studies.

**Table S1 - Characteristics of the studies eligible for inclusion**

| Study                      | Country | Design | Participants |            | Training Status | Intervention Dose                                                                   | Duration (Weeks) | Training                                                                                | HMB n | Control n | Outcome Measure |            |                  |     |
|----------------------------|---------|--------|--------------|------------|-----------------|-------------------------------------------------------------------------------------|------------------|-----------------------------------------------------------------------------------------|-------|-----------|-----------------|------------|------------------|-----|
|                            |         |        | Sex          | Age        |                 |                                                                                     |                  |                                                                                         |       |           | Strength        |            | Body composition |     |
|                            |         |        |              |            |                 |                                                                                     |                  |                                                                                         |       |           | Upper Body      | Lower Body | FFM              | FM  |
| Asadi et al., 2017[10]     | Japan   | RCT DB | M            | 21.4±0.7   | Not Described   | 3g HMB-FA                                                                           | 6                | 2x/w<br>3 sets of 8–12 rep at 75–85% of 1RM                                             | 8     | 8         | Bench press     | Leg Press  | ---              | --- |
| Jakubowski et al., 2019[9] | Canada  | RCT DB | M            | 22.5±2.2   | TR              | 3g HMB-Ca + 50g Whey Protein                                                        | 12               | 3-5x/w<br>Phase 1: 8w UPRT<br>Phase 2: 2w overreaching<br>Phase 3: 2w                   | 13    | 13        | Bench press     | Squat      | DXA              | DXA |
| Kraemer et al (2009)[35]   | USA     | RCT DB | M            | 22.9 ± 2.8 | TR              | 3 g HMB-Ca<br>10g Glycine,<br>11.5g Alanine,<br>1.5g Glutamic Acid,<br>1.5 g Serine | 12               | 3x/w<br>UPRT                                                                            | 8     | 9         | Bench press     | Squat      | DXA              | DXA |
| Kreider et al (1999)[3]    | USA     | RCT DB | M            | 25.1 ± 1   | TR              | 3 g HMB-CA<br>Drink:<br>81g CHO,75g PRO, 3g FAT                                     | 4                | 6.9 ± 0.5 hr/w                                                                          | ?     | ?         | Bench press     | Leg Press  | DXA              | DXA |
| Kreider et al (2000)[5]    | USA     | RCT DB | M            | 20.0±1.5   | TR              | 3g HMB-Ca, 99 g/d of glucose, and 3 g/d of taurine.                                 | 4                | 4x/w , 1 to 3 sets of 2-8 rep, 60 to 95% of 1 RM (+ 3x week of agility/sprint training) | 14    | 14        | Bench Press     | Squat      | DXA              | DXA |

|                           |           |         |     |                              |                            |                                                                                            |    |                                                                                                                             |              |              |                              |                                    |        |       |
|---------------------------|-----------|---------|-----|------------------------------|----------------------------|--------------------------------------------------------------------------------------------|----|-----------------------------------------------------------------------------------------------------------------------------|--------------|--------------|------------------------------|------------------------------------|--------|-------|
| Nissen et al., 1996[2]    | USA       | RCT DB? | M   | 19-29                        | UT (at least 3 months)     | 3 g HMB-Ca +MET-Rx TM (37g milk protein)                                                   | 7  | 3x/w 3 sets of 3–5 rep at 90% of 1 RM.                                                                                      | 14           | 14           | Several upper body exercises | Several lower body exercises       | TOBE C | TOBEC |
| Panton et al (2000)[4]    | USA       | RCT DB  | M/F | 25 ± 1.2 (M)<br>23 ± 0.6 (F) | TR                         | 3 g HMB-Ca                                                                                 | 4  | 3 x/w. 3-6 rep 90% 1RM.                                                                                                     | 39 (21M/18F) | 36 (18M/18F) | Bench press                  | Leg Press (M)<br>Leg Extension (F) | UWW    | UWW   |
| Slater et al (2001)[6]    | Australia | RCT DB  | M   | 24.5±1.7                     | TR                         | 3 g HMB-Ca (Standard encapsulation vs. Time Release)                                       | 6  | 2-3x /w. 4-6 repetitions for 3-5 sets (24 to 32 sets per session)                                                           | 7            | 7            | Bench press                  | Leg Press                          | DXA    | DXA   |
| Stahn et al (2020)[39]    | USA       | RCT DB  | M   | 22.1±1.5                     | UT (for the past 6 months) | 3 g HMB-Ca + 30g Whey Protein (daily). +30g carbohydrate supplement only on training days. | 12 | 4x/w upper/lower body split routine. Weeks 1-6: linear periodization. Week 7 tapering. Weeks 8-12: undulating periodization | 8            | 7            | Bench Press                  | Leg Press                          | BIA    | BIA   |
| Teixeira et al., 2019a[8] | Portugal  | RCT DB  | M   | 31.7±7.6                     | TR                         | 3g HMB-Ca or 3g HMB-FA                                                                     | 8  | 3x/w Weeks 1-3, 3-4 sets 12RM<br>Weeks 4-6, 3-4 sets 10RM<br>Weeks 7-8, 4 sets 8RM                                          | 20           | 10           | ---                          | ---                                | DXA    | DXA   |

|                            |             |        |   |          |    |                        |    |                                                                               |    |    |             |               |     |     |
|----------------------------|-------------|--------|---|----------|----|------------------------|----|-------------------------------------------------------------------------------|----|----|-------------|---------------|-----|-----|
| Teixeira et al., 2019b[12] | Portugal    | RCT DB | M | 31.7±7.6 | TR | 3g HMB-Ca or 3g HMB-FA | 8  | 3x /w Weeks 1-3, 3-4 sets 12RM Weeks 4-6, 3-4 sets 10RM Weeks 7-8, 4 sets 8RM | 20 | 10 | Bench Press | Squat         | --- | --- |
| Thomson et al (2009)[37]   | New Zealand | RCT DB | M | 24 ± 4   | TR | 3 g HMB-Ca             | 9  | 3x /w                                                                         | 13 | 9  | Bench press | Leg extension | BIA | BIA |
| Tritto et al, 2019[38]     | Brazil      | RCT DB | M | 25.3±3.7 | TR | 3g HMB-Ca or 3g HMB-FA | 12 | 2x /w 3-4 sets 8-10RM                                                         | 29 | 15 | Bench press | Leg Press     | DXA | DXA |
| Wilson et al., 2014[36]    | USA         | RCT DB | M | 21.6±0.5 | TR | 3g HMB-FA              | 12 | 3-5x /w Phase 1: 8w UPRT Phase 2: 2w overreaching Phase 3: 2w                 | 11 | 9  | Bench Press | Squat         | DXA | DXA |

---

BIA: bioelectrical impedance; CHO: Carbohydrates; DB: Double blinded; DXA: dual x-ray absorptiometry; FAT: Lipids; FFM: Free fat mass; FM: Fat mass; PRO: Protein; RCT: Randomized controlled trial; rep: repetitions per set; RM; Repetition maximum; TOBEC: Total body electrical conductivity; TR: Trained; UPRT: undulating periodized resistance-training; UT: Untrained; UWW: Under water weighting

**Table S2 – List of studies removed from the meta-analysis after data collection and asymmetry with reason for exclusion**

| <b>Study</b>             | <b>Reason for analysis exclusion</b>                          |
|--------------------------|---------------------------------------------------------------|
| Kraemer et al., 2009[35] | excluded based on funnel plot analysis of lean body mass data |
| Kreider et al., 1999[3]  | missing data for performing meta-analysis, subjects per group |
| Wilson et al., 2014[36]  | excluded based on funnel plot analysis of lean body mass data |

## Supplementary information – Search Strategy

Database: OVID Medline Epub Ahead of Print, In-Process & Other Non-Indexed Citations, Ovid MEDLINE(R) Daily and Ovid MEDLINE(R) 1946 to Present

Search Strategy:

-----  
beta-hydroxy, beta-methylbutyrate  
beta-hydroxy-beta-methylbutyrate  
beta-hydroxy beta-methylbutyrate  
beta-hydroxy-beta methylbutyrate  
HMB.tw,kf  
    HMB-Ca.tw,kf  
HMB-Fa.tw,kf  
((calcium or free acid) adj2 beta-hydroxy-beta-methylbutyrate).tw,kf  
(beta-hydroxy-beta-methylbutyrate adj2 supplement\*).tw,kf

Skeletal Muscle

Body composition

((lean or muscle) adj2 mass).tw,kf

Musc\* adj2 Hypertrophy

Resistance Training

((resistance) adj2 (exercise or training)).tw,kf

Muscle strength

Database: OVID Medline Epub Ahead of Print, In-Process & Other Non-Indexed Citations, Ovid MEDLINE(R) Daily and Ovid MEDLINE(R) 1946 to Present

Search Strategy:

- 
- 1 beta-hydroxy, beta-methylbutyrate.mp. (336)
  - 2 hmb.mp. (2855)
  - 3 HMB-Ca.mp. (12)
  - 4 HMB-Fa.mp. (26)
  - 5 1 or 2 or 3 or 4 (2917)
  - 6 exp Muscle, Skeletal/ (263893)
  - 7 muscle\*.mp. (917658)
  - 8 exp Muscle Strength/ (19245)
  - 9 ((muscle\* or hand or grip) adj2 strength).mp. (55981)

- 10 Creatine Kinase/ (24181)
- 11 creatine kinase.mp. (37126)
- 12 Resistance Training/ (8337)
- 13 ((strength) adj2 training).mp. (5715)
- 14 Hypertrophy/ (22822)
- 15 muscular.mp. (125396)
- 16 Inflammation/ (153552)
- 17 inflam\*.mp. (1030839)
- 18 exp Muscular Atrophy/ (14667)
- 19 sarcopenia.mp. (8626)
- 20 atroph\*.mp. (137154)
- 21 or/6-20 (2129243)
- 22 5 and 21 (810)
- 23 remove duplicates from 22 (803)
- 24 animals/ not (humans/ and animals/) (4651948)
- 25 23 not 24 (721)
- 26 limit 25 to English language (667)

Database: Embase <1974 to 2020 April 02>

Search Strategy:

- 
- 1 beta-hydroxy, beta-methylbutyrate.mp. (437)
  - 2 HMB.mp. (5163)
  - 3 HMB-Ca.mp. (8)
  - 4 HMB-Fa.mp. (21)
  - 5 1 or 2 or 3 or 4 (5266)
  - 6 exp skeletal muscle/ (335102)
  - 7 muscle\*.mp. (1534153)
  - 8 muscle strength/ (61491)
  - 9 ((musc\* or hand or grip) adj2 strength).mp. (93810)
  - 10 Creatine kinase.mp. or creatine kinase/ (68995)
  - 11 muscle strength/ or muscle hypertrophy/ or resistance training/ (78812)
  - 12 ((resistance or strength) adj2 training).mp. (24119)
  - 13 hypertrophy/ (28416)
  - 14 muscular.mp. (123936)
  - 15 inflammation/ (430088)
  - 16 inflam\*.mp. (1499389)
  - 17 muscle atrophy/ (31358)



- 18 sarcopenia.mp. (14170)
- 19 atroph\*.mp. (225839)
- 20 musculoskeletal system inflammation/ (164)
- 21 or/6-20 (3213445)
- 22 5 and 21 (1489)
- 23 remove duplicates from 22 (1473)
- 24 animals/ not (humans/ and animals/) (955029)
- 25 23 not 24 (1452)
- 26 limit 25 to english language (1370)
